# Supplementary material
Source: publisher figshare collection journal article supplement (https://acs.figshare.com/ndownloader/files/13054847)
Supplement: Supplementary file 1 [file 13054847]

**Structural, Mechanistic and Ultra-dilute Catalysis Portrayal of Substrate Inhibition in the TAML–Hydrogen Peroxide Catalytic Oxidation of the Persistent Drug and Micropollutant, Propranolol**

Yogesh Somasundar,<sup>1</sup> Longzhu Q. Shen,<sup>2</sup> Alexis G. Hoane,<sup>1</sup> Liang L. Tang,<sup>1</sup> Matthew R. Mills,<sup>1</sup> Abigail E. Burton,<sup>1</sup> Alexander D. Ryabov,<sup>1\*</sup> and Terrence J. Collins<sup>1\*</sup>

<sup>1</sup>Department of Chemistry, Carnegie Mellon University, 4400 Fifth Avenue, Pittsburgh, Pennsylvania 15213, United States

<sup>2</sup>Department of Zoology, University of Cambridge, Downing Street, Cambridge CB2 3EJ, UK

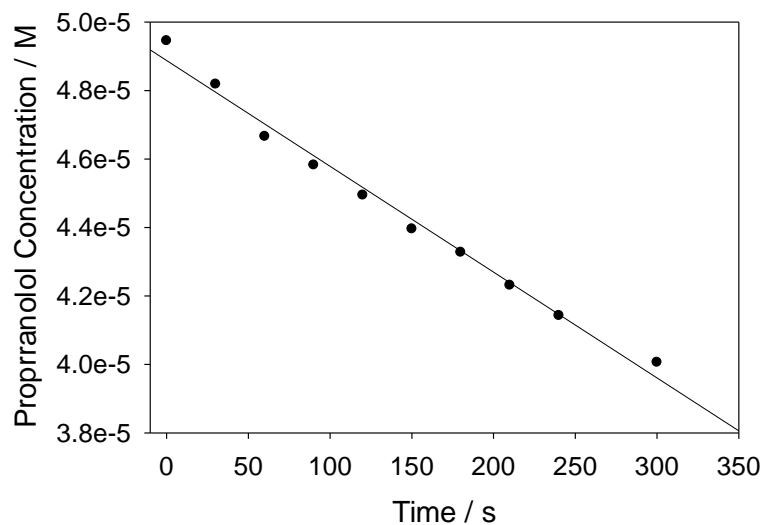

**Figure S1:** Determination of initial rate (slope of the line) when  $\leq 20\%$  reaction is completed. Conditions: **[1a]**  $1 \times 10^{-6}$  M, [propranolol]  $5 \times 10^{-5}$  M,  $[\text{H}_2\text{O}_2]$   $1 \times 10^{-3}$  M, pH 9 (0.01 M phosphate), 25 °C.

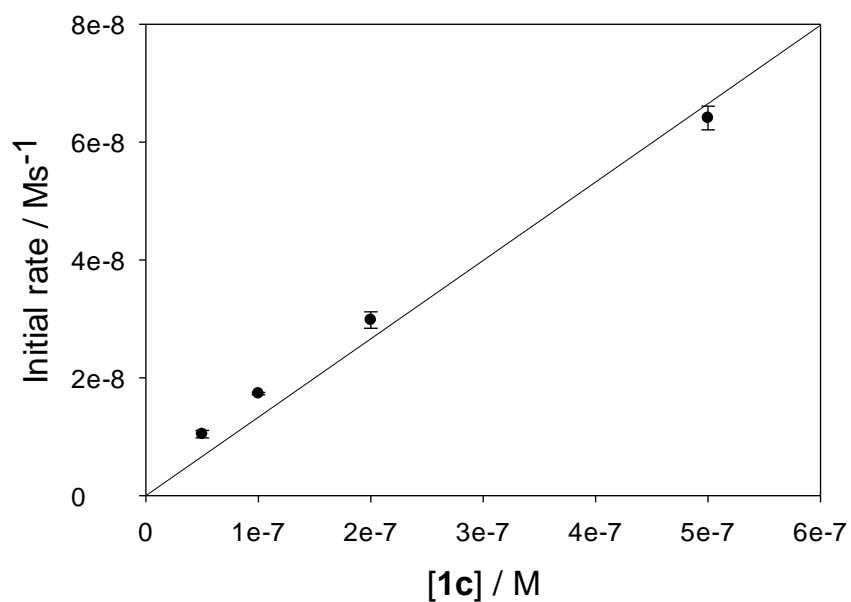

**Figure S2.** Initial rate of propranolol degradation by  $\text{H}_2\text{O}_2$  catalyzed by **1c** as a function of **[1c]**. Conditions: **[1c]**  $(5-50) \times 10^{-8}$  M, [propranolol]  $5 \times 10^{-5}$  M,  $[\text{H}_2\text{O}_2]$   $3 \times 10^{-3}$  M, pH 7 (0.01 M phosphate).

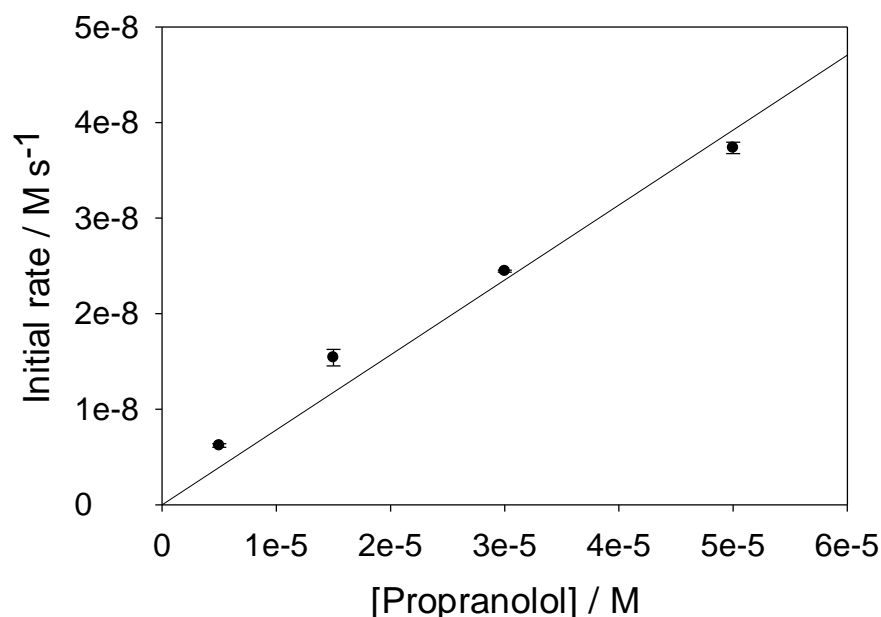

**Figure S3.** Initial rate of propranolol degradation by H<sub>2</sub>O<sub>2</sub> catalyzed by **1a** as a function of [propranolol]. Conditions: [**1a**] 1×10<sup>-6</sup> M, [propranolol] (5-50) × 10<sup>-6</sup> M, [H<sub>2</sub>O<sub>2</sub>] 4.25×10<sup>-3</sup> M, pH 9 (0.01 M phosphate).

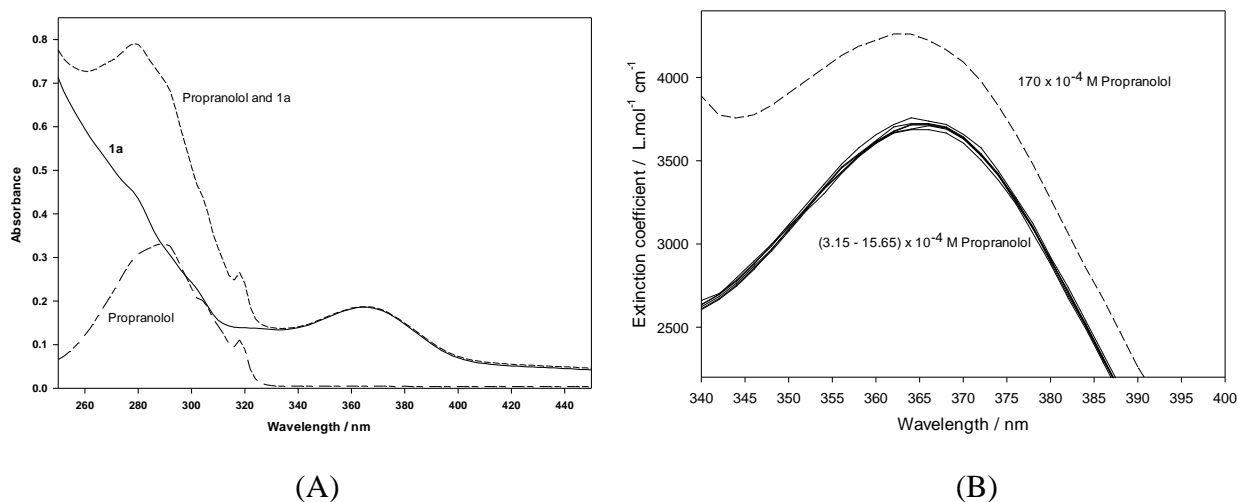

**Figure S4.** (A) UV-vis spectrum of propranolol (5×10<sup>-5</sup> M), **1a** (5×10<sup>-5</sup> M), and propranolol and **1a** (5×10<sup>-5</sup> M each), in pH 7 0.01 M phosphate buffer. (B) the variation of extinction coefficient of **1a** (5×10<sup>-5</sup> M) upon titration with propranolol. Solid lines represent propranolol (3.2 - 15.7) × 10<sup>-4</sup> M and the dotted line represents propranolol (170 × 10<sup>-4</sup> M).

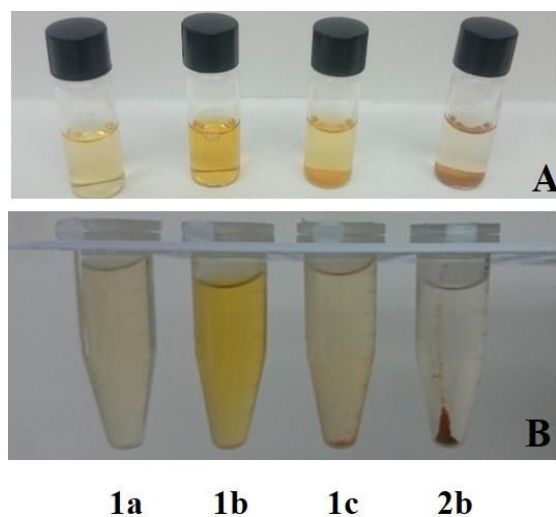

**Figure S5:** Mixtures of propranolol with TAMs (left to right: **1a**, **1b**, **1c**, **2b**) showing the formation of precipitates for **1c** and **2b** before (A) and after (B) centrifugation. Conditions: propranolol ( $7.5 \times 10^{-2}$  M), TAMs ( $4.5 \times 10^{-4}$  M), pH 7.0, room temperature.

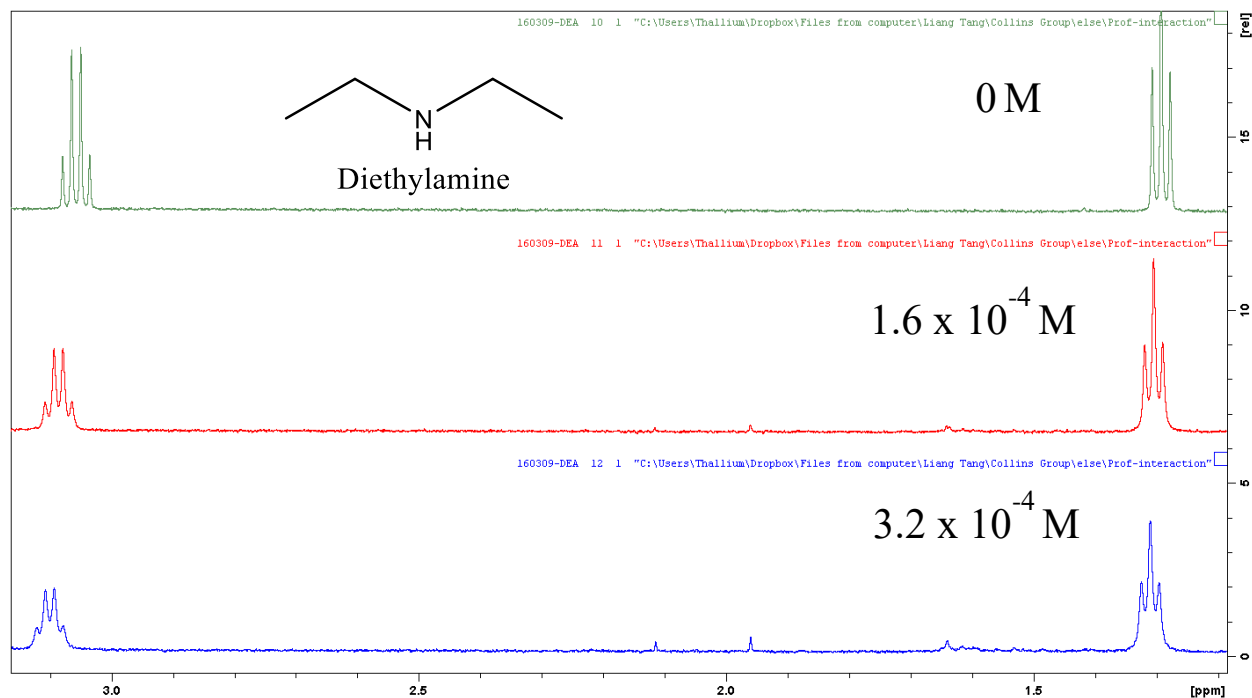

**Figure S6.**  $^1\text{H}$  NMR spectra of diethylamine alone (0.015 M, top) and in the presence of **1b** ( $1.6 \times 10^{-4}$  and  $3.2 \times 10^{-4}$  M, middle and bottom, respectively). Conditions:  $\text{D}_2\text{O}$ ,  $25^\circ\text{C}$ .

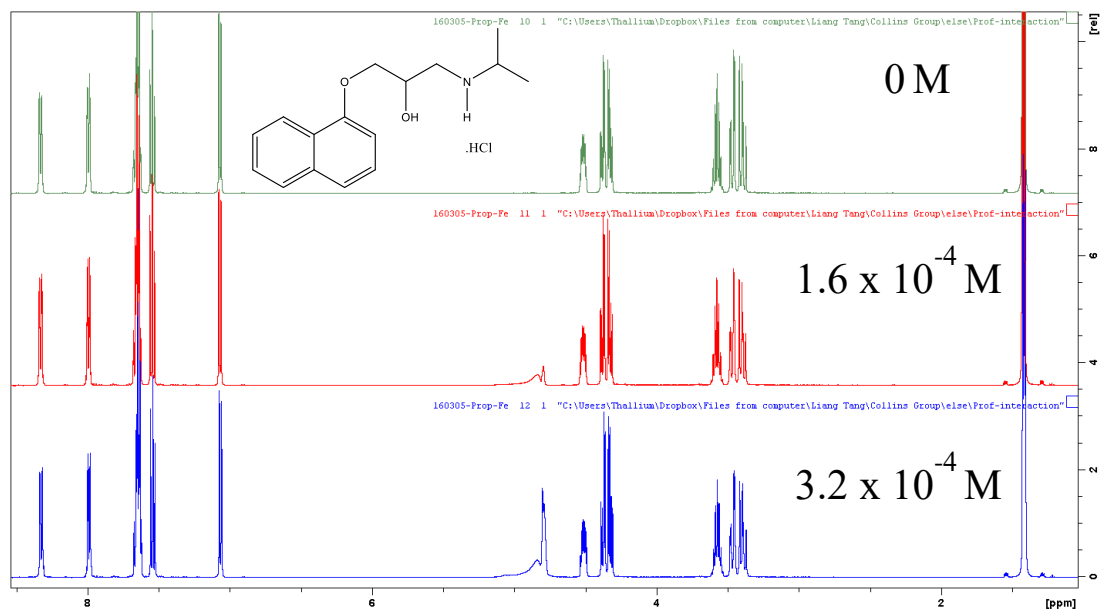

**Figure S7.** <sup>1</sup>H NMR spectra of propranolol alone (0.015 M, top) and in the presence of FeCl<sub>3</sub> (1.6×10<sup>-4</sup> and 3.2×10<sup>-4</sup> M, middle and bottom, respectively). Conditions: D<sub>2</sub>O, 25 °C.

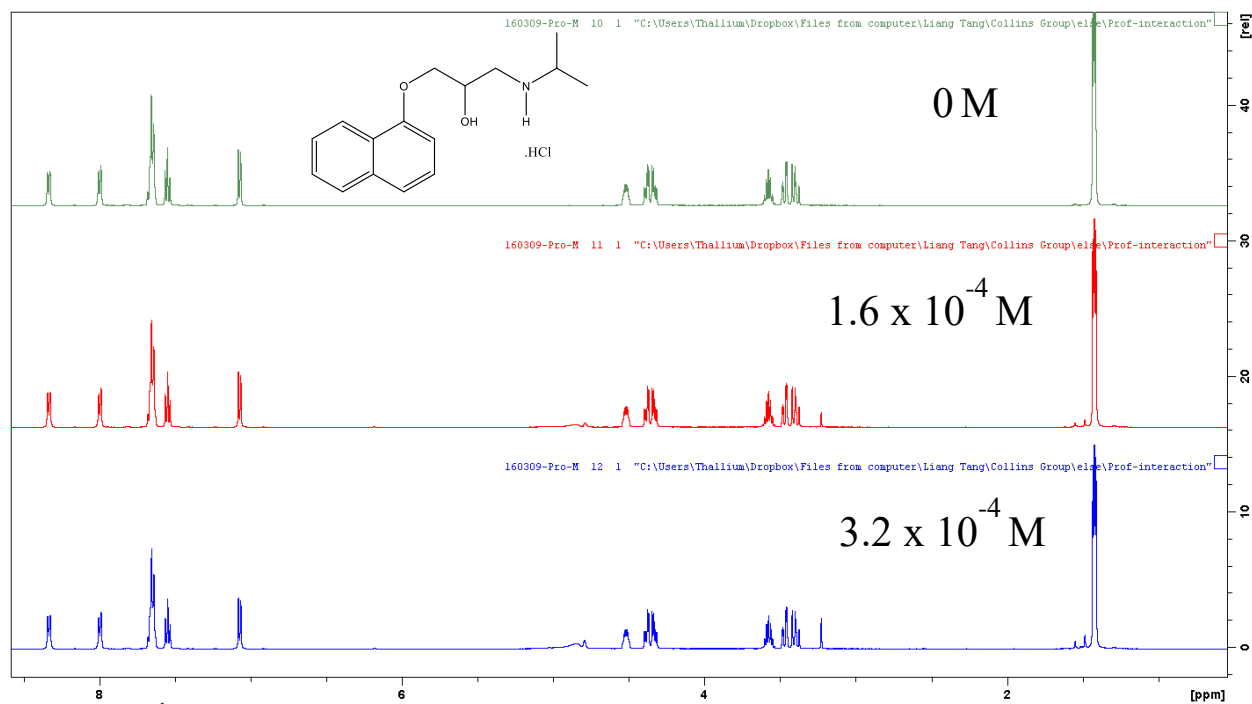

**Figure S8.** <sup>1</sup>H NMR spectra of propranolol alone (0.015 M, top) and in the presence of **3** (1.6×10<sup>-4</sup> and 3.2×10<sup>-4</sup> M, middle and bottom, respectively). Conditions: D<sub>2</sub>O, 25 °C.

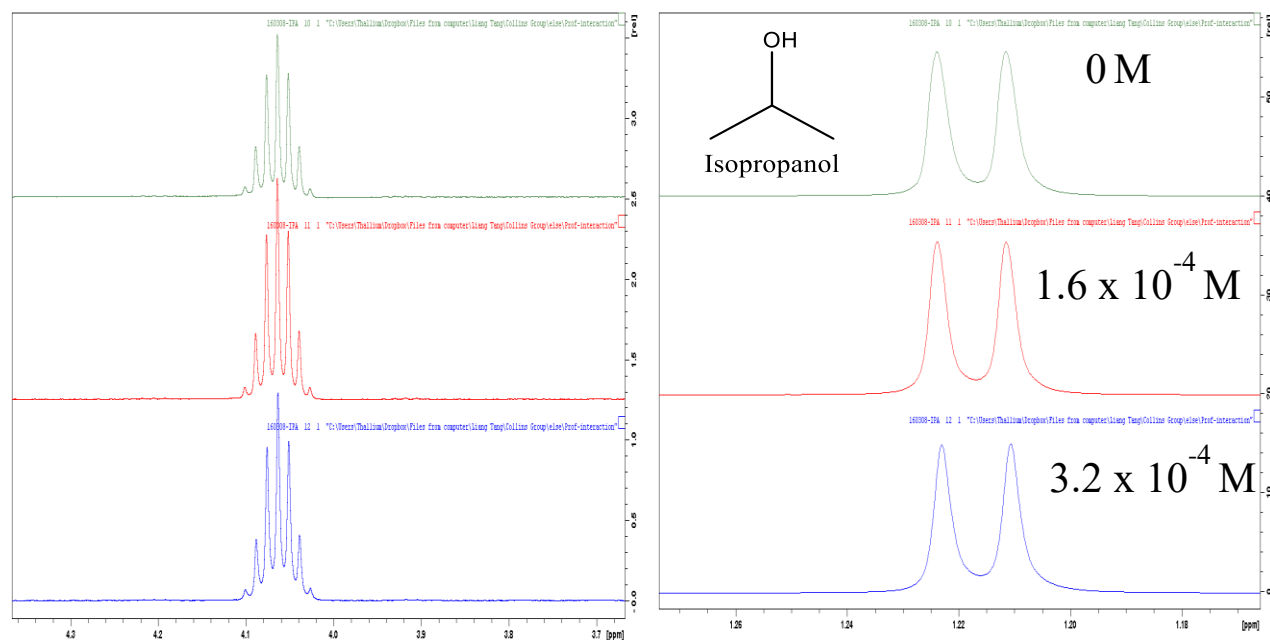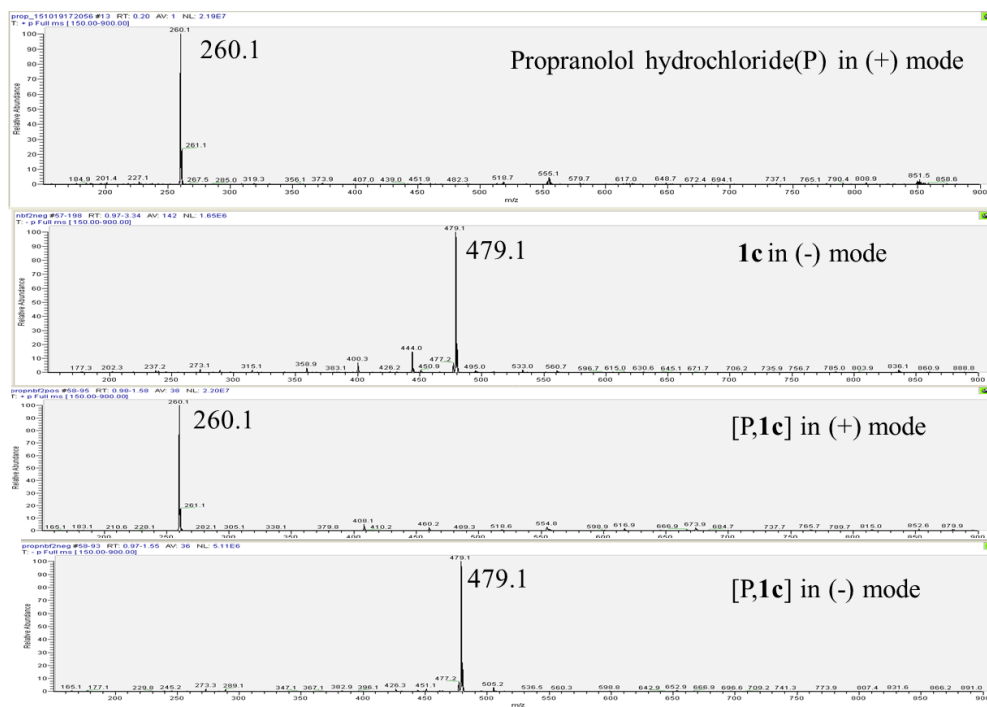

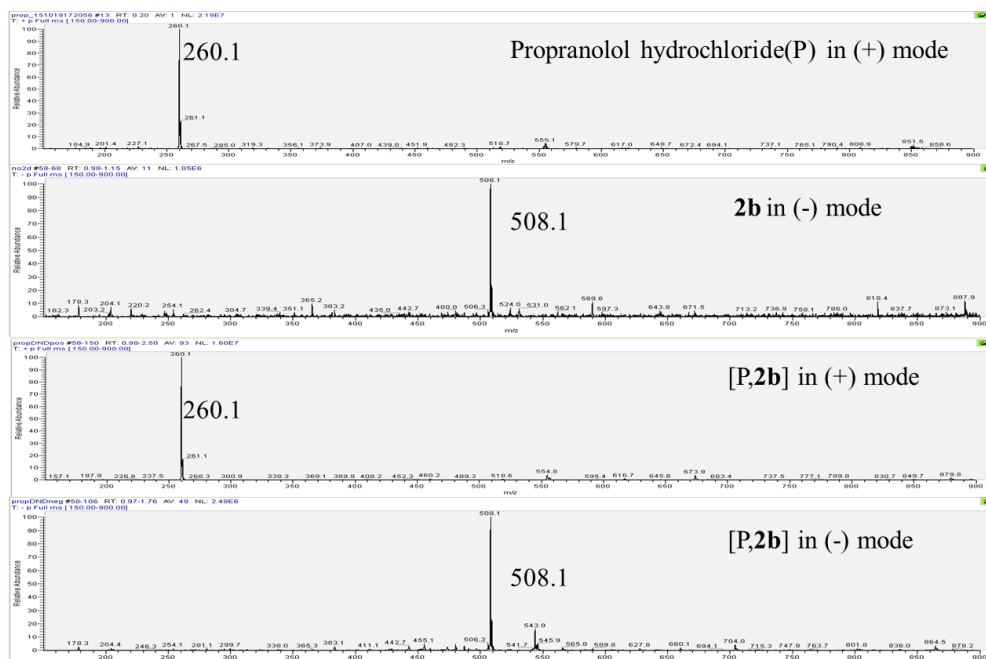

**Figure S11.** ESI-MS of propranolol, **2b** and [P,**2b**] in methanol. Conditions: 10  $\mu$ L injection, 25  $^{\circ}$ C.

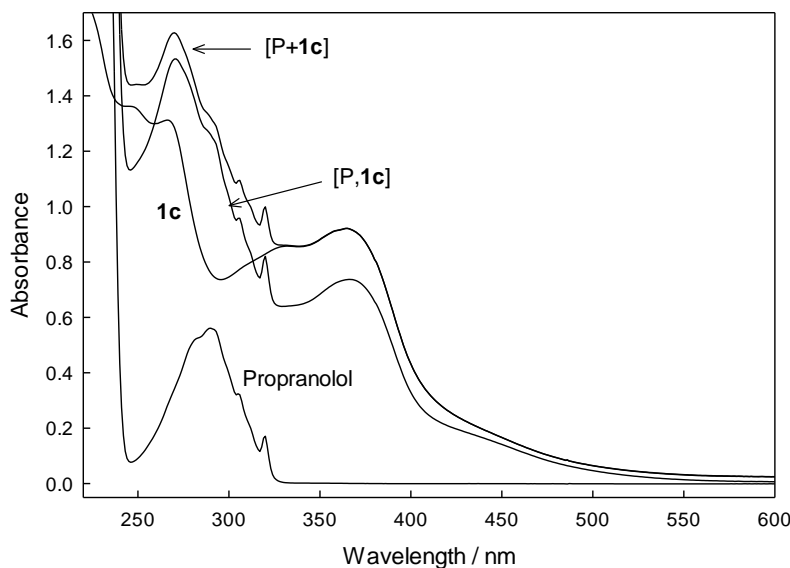

**Figure S12.** UV-vis spectra of propranolol ( $9 \times 10^{-5}$  M), **1c** ( $9 \times 10^{-5}$  M), [P,**1c**] adduct (ca.  $8 \times 10^{-5}$  M) and the sum of the spectra of propranolol and **1c** (both  $9 \times 10^{-5}$  M, P + **1c**). All spectra are in methanol.

Propranolol does not absorb light at 365 nm and therefore the concentration of **1c** in solution can be calculated from absorbance at 365 nm. At 290 nm (maximum for propranolol), the absorbance

$A = c_p \epsilon_p + c_{1c} \epsilon_{1c}$  and the concentration of propranolol  $c_p$  is easy to find since the extinction coefficients  $\epsilon_p$  and  $\epsilon_{1c}$  for propranolol and **1c**, respectively, and the concentration of **1c** ( $c_{1c}$ ) are known. This routine confirmed an approximate 1:1 stoichiometry of the [P,TAML] adducts (Table S1). The exact P:TAML ratio was found to be 1.2 and 1.4 for **1c** and **2b**, respectively. Based on these stoichiometries, the isolated yields of the adducts equal 42% and 124% for **1c** and **2b**, respectively.

**Table S1.** Stoichiometry of [P,TAML] adducts.

| Adduct type | Concentration of TAML x 10 <sup>4</sup> M |       | Average concentration of Propranolol x 10 <sup>4</sup> M |       |       | Ratio of Propranolol : TAML |         |
|-------------|-------------------------------------------|-------|----------------------------------------------------------|-------|-------|-----------------------------|---------|
|             | 365nm                                     | 445nm | 280nm                                                    | 290nm | 300nm |                             |         |
| P+1c        | 0.79                                      | -     | 1.02                                                     | 0.95  | 0.90  | 0.95(3)                     | 1.2 (3) |
| P+2         | -                                         | 0.84  | 1.25                                                     | 1.18  | 1.08  | 1.17 (3)                    | 1.4 (3) |

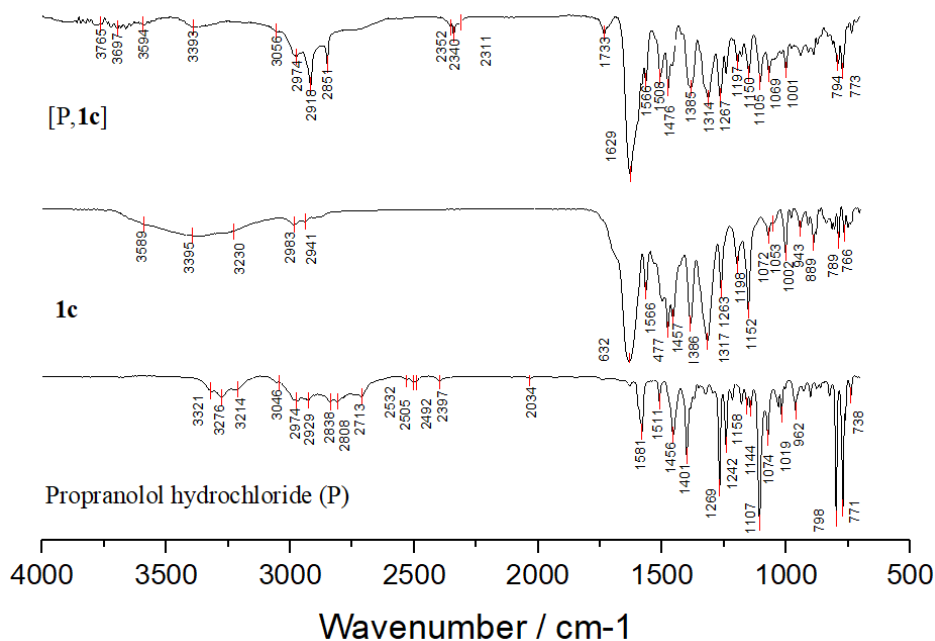

**Figure S13.** Infrared spectra of propranolol (P), **1c** and [P,**1c**]. Conditions: ATR accessory, germanium crystal, 25 °C. (All the spectra are scaled differently).



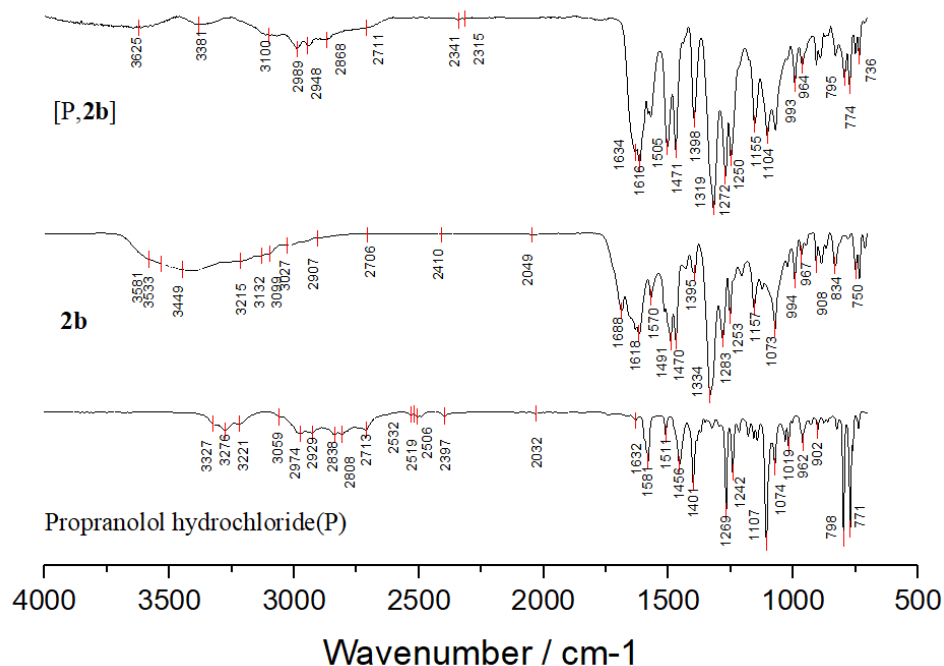

**Figure S14.** Infrared spectra of propranolol (P), **2b** and [P,**2b**]. Conditions: ATR accessory, germanium crystal, 25 °C. (All the spectra are scaled differently).

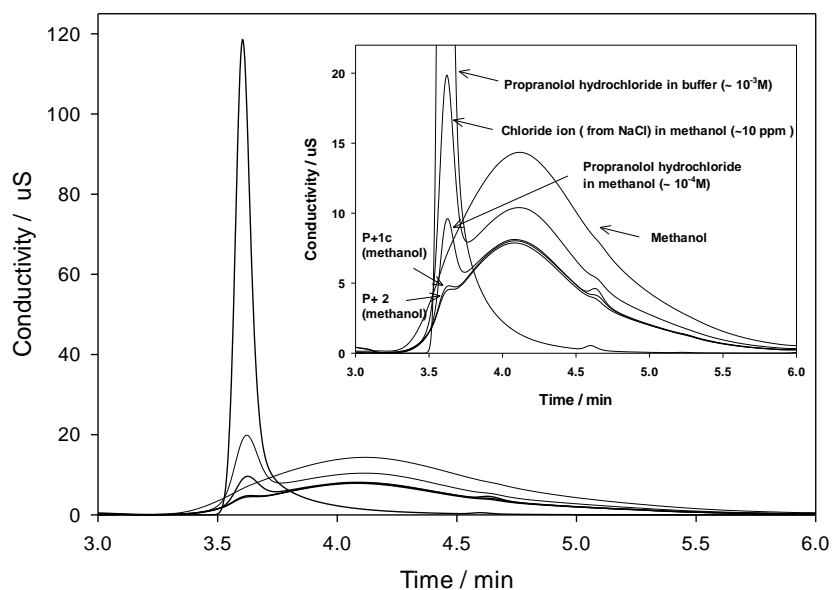

**Figure S15.** Ion chromatogram for the anionic component of [P,**1c**] and [P,**2b**] in methanol. Inset: zoomed in area between 0-20  $\mu$ S. Conditions: Sample prepared at 25 °C, 25  $\mu$ L injection. A trace of chloride remains in the isolated adducts as seen in the peak at 3.6 min.

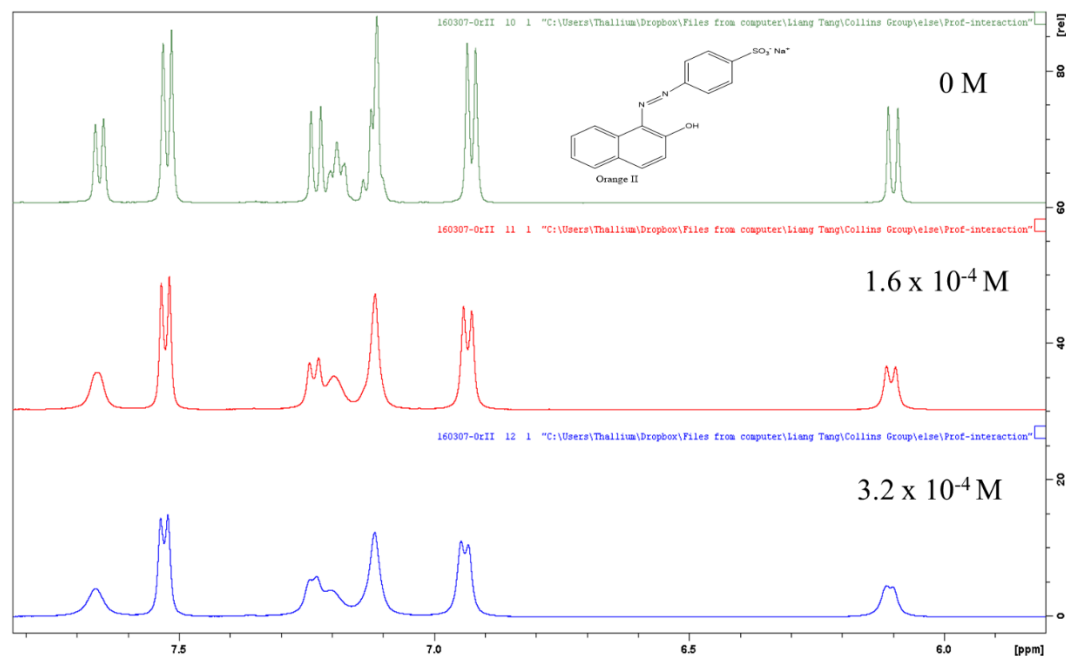

**Figure S16.**  $^1\text{H}$  NMR spectra of OrangeII alone (0.015 M, top) and in the presence of **1b** ( $1.6 \times 10^{-4}$  and  $3.2 \times 10^{-4}$  M, middle and bottom, respectively). Conditions:  $\text{D}_2\text{O}$ , 25 °C.

**Table S2.** Rate constants  $k_{\text{I}}$  and  $k_{\text{II}}$  for Propranolol at 25 °C compared with  $k_{\text{I}}$  values reported previously using other test substrates; calculated equilibrium constants,  $K$  and corresponding free energy change,  $\Delta G^\circ$ .

| TAML      | pH  | $k_{\text{I}}$<br>$\text{M}^{-1} \text{s}^{-1}$ | $10^{-2} \times k_{\text{II}}$<br>$\text{M}^{-1} \text{s}^{-1}$ | $k_{\text{I}}^{\text{OrII}}$ or $k_{\text{I}}^{\text{Ru}}$<br>$\text{M}^{-1} \text{s}^{-1}$ | $k_{\text{I}}^{\text{OrII}}/k_{\text{I}}$<br>or<br>$k_{\text{I}}^{\text{Ru}}/k_{\text{I}}$ | $10^{-5} \times K^{\text{e}}$<br>M | $\Delta G^\circ$<br>$\text{kcal mol}^{-1}$ |
|-----------|-----|-------------------------------------------------|-----------------------------------------------------------------|---------------------------------------------------------------------------------------------|--------------------------------------------------------------------------------------------|------------------------------------|--------------------------------------------|
| <b>1a</b> | 7.0 | $2.0 \pm 0.1$                                   | $0.7 \pm 0.2$                                                   | $31.4 \pm 0.1^{\text{a}}$                                                                   | 16                                                                                         | 3                                  | -7.5                                       |
|           | 7.0 |                                                 |                                                                 | $52 \pm 2^{\text{c}}$                                                                       | 26                                                                                         | 5                                  | -7.8                                       |
|           | 9.0 | $74 \pm 3$                                      | $8.0 \pm 0.3$                                                   | $1400 \pm 10^{\text{b}}$                                                                    | 19                                                                                         | 3.6                                | -7.6                                       |
|           | 9.0 |                                                 |                                                                 | $2400 \pm 300^{\text{c}}$                                                                   | 32                                                                                         | 6.2                                | -7.9                                       |
| <b>1b</b> | 7.0 | $5.0 \pm 0.2$                                   | $1.4 \pm 0.2$                                                   | $152 \pm 5^{\text{a}}$                                                                      | 30                                                                                         | 5.8                                | -7.9                                       |
|           | 9.0 | $149 \pm 5$                                     | $35 \pm 1$                                                      |                                                                                             |                                                                                            |                                    |                                            |
| <b>1c</b> | 7.0 | $90 \pm 10$                                     | $146 \pm 2$                                                     | $350 \pm 2^{\text{a}}$                                                                      | 4                                                                                          | 0.6                                | -6.5                                       |
|           | 9.0 | $2990 \pm 50$                                   | $680 \pm 10$                                                    |                                                                                             |                                                                                            |                                    |                                            |
| <b>2b</b> | 7.0 | $200 \pm 10$                                    | $53 \pm 24$                                                     | $1900 \pm 100^{\text{a}}$                                                                   | 9.5                                                                                        | 1.7                                | -7.1                                       |
|           | 9.0 | $4200 \pm 400$                                  | $500 \pm 40$                                                    | $16,000 \pm 2000^{\text{d}}$                                                                | 4                                                                                          | 0.6                                | -6.5                                       |

<sup>a)</sup> Orange II; from ref.<sup>72</sup> <sup>b)</sup> Orange II; from ref.<sup>80</sup> <sup>c)</sup> Cyclometalated ruthenium(II) dye  $[\text{Ru}^{\text{II}}(\text{o-C}_6\text{H}_4\text{-2-py})(\text{phen})_2]^+$ <sup>83</sup>; from ref.<sup>81</sup> <sup>d)</sup> Orange II; from ref.<sup>70</sup>
